# Supplementary material for: A Phase I Study of Oral ARRY-614, a p38 MAPK/Tie2 Dual Inhibitor, in Patients with Low or Intermediate-1 Risk Myelodysplastic Syndromes
Source: Oxford University Press journal article supplement (doi:10.1158/1078-0432.ccr-14-1765), 2014-12-05
Supplement: 10780432ccr141765-sup-134376_1_supp_0_nh00wh.docx [file 10780432ccr141765-sup-134376_1_supp_0_nh00wh.docx]

**Supplemental Table 2. Dose escalation PK parameters for ARRY-614**

| **Dose (mg)** | **Study Day** | **N** | **Tmaxa,c**  **hr** | **Cmaxb**  **ng/mL** | **AUCtaub**  **ng*hr/mL** | **RAUCb** |
| --- | --- | --- | --- | --- | --- | --- |
| **Fasted Cohorts** | | | | | | |
| 200 mg BID | 1 | 3 | 3 (3 – 3) | 258 (118) | 1400 (195) |  |
|  | 15 | 2 | 2 (1 – 3) | 380 (NC) | 1770 (NC) | 0.879 (NC) |
| 300 mg BID | 1 | 5 | 3 (3 – 6) | 543 (188) | 2620 (155) |  |
|  | 15 | 6 | 3 (1 – 6) | 843 (114) | 4860 (113) | 2.07 (103) |
| 400 mg QD | 1 | 7 | 3 (1 – 3) | 548 (66.5) | 3750 (73.0) |  |
|  | 15 | 6 | 3 (3 – 6) | 713 (65.2) | 5840 (71.3) | 1.70 (99.8) |
| 600 mg QD | 1 | 4 | 3 (1 – 3) | 1040 (63.3) | 4890 (67.5) |  |
|  | 15 | 4 | 3 (1 – 8) | 944 (164) | 7150 (104) | 1.46 (27.2) |
| 900 mg QD | 1 | 3 | 3 (3 – 6) | 751 (77.8) | 6300 (143) |  |
|  | 15 | 3 | 3 (3 – 3) | 567 (206) | 5390 (385) | 0.856 (82.4) |
| 1200 mg QD | 1 | 6 | 3 (3 – 8) | 1580 (59.9) | 16100(59.2) |  |
|  | 15 | 5 | 3 (0 – 24) | 2050 (47.1) | 19600 (38.4) | 1.13 (88.1) |
| **Fed/Fasted Cohort** | | | | | | | |
| 400 mg QD | -3 (Fasted) | 5 | 3 (3 – 3) | 783 (125) | 4520 (117) |  |
|  | 1 (Fed) | 5 | 7.50 (6 – 8) | 387 (159) | 3780 (194) |  |

NC = Not Calculated (n ≤ 2)

a Parameters presented as median (range)

b Parameters presented as geometric mean (geometric %CV)

**c** Values presented as Nominal Time
